# Supplementary material
Source: PubMed Central journal article supplement (PMC9018659)
Supplement: 41999_2021_555_MOESM2_ESM.pdf [file 41999_2021_555_MOESM2_ESM.pdf]

**Supplemental table 1**

Blood tests with reference values used to construct the FI-lab variable

|                                       | Low cut-off   | High cut-off |
|---------------------------------------|---------------|--------------|
| Hemoglobin (g/dL)                     | Females: 11.7 | 15.3         |
|                                       | Males: 13.4   | 17.0         |
| Mean corpuscular volume (fL)          | 82            | 98           |
| Thrombocytes ( $10^9/L$ )             | 145           | 390          |
| Leukocytes ( $10^9/L$ )               | 3.5           | 10.0         |
| Erythrocyte sedimentation rate        | Females: 1    | 17           |
|                                       | Males: 1      | 12           |
| Sodium (mmol/L)                       | 137           | 145          |
| Potassium (mmol/L)                    | 3.6           | 4.6          |
| Alanine transaminase (U/L)            | Females: 10   | 45           |
|                                       | Males: 10     | 70           |
| Total bilirubin ( $\mu\text{mol/L}$ ) | 5             | 25           |
| Urea (mmol/L)                         | Females: 3.1  | 7.9          |
|                                       | Males: 3.5    | 8.1          |
| Creatinine ( $\mu\text{mol/L}$ )      | Females: 45   | 90           |
|                                       | Males: 60     | 105          |
| Glucose (mmol/L)                      | 4.0           | 6.0          |
| C-reactive protein (mg/L)             |               | 4            |
| Albumin (g/L)                         | 34            | 50           |

---

Normal reference values from Department of Medical Biochemistry, Oslo university hospital.
