# Supplementary material
Source: PubMed Central journal article supplement (PMC9018659)
Supplement: 41999_2021_555_MOESM3_ESM.pdf [file 41999_2021_555_MOESM3_ESM.pdf]

**Supplemental table 2**

Patient characteristics in relation to degree of frailty.

|                                                       | Fit – well<br>(CFS 1 to 3,<br>n=23) | Very mild -<br>Mild frailty<br>(CFS 4 to 5,<br>n=88) | Moderate<br>frailty (CFS<br>6, n=44) | Severe<br>frailty (CFS<br>7 to 8,<br>n=40) | p-value* |
|-------------------------------------------------------|-------------------------------------|------------------------------------------------------|--------------------------------------|--------------------------------------------|----------|
| Mean age, years<br>(SD)                               | 83.6 (6.2)                          | 86.0 (5.5)                                           | 86.7 (5.6)                           | 88.0 (5.5)                                 | .004     |
| Female, <i>N</i> (%)                                  | 10 (44)                             | 57 (65)                                              | 34 (77)                              | 21 (53)                                    | .66      |
| Median number of<br>medications on<br>discharge (IQR) | 5 (4)                               | 6 (4)                                                | 7 (4)                                | 7 (5)                                      | .001     |
| Mean Charlson<br>Comorbidity Index,<br>(SD)           | 1.4 (1.5)                           | 1.8 (1.8)                                            | 1.9 (1.7)                            | 2.5 (1.7)                                  | .015     |
| Delirium during<br>hospital stay, <i>N</i> (%)        | 0 (0)                               | 24 (27)                                              | 18 (41)                              | 20 (50)                                    | <.001    |
| Median length of<br>hospital stay (IQR)               | 4 (5)                               | 6 (4)                                                | 8 (6)                                | 9 (7)                                      | <.001    |
| <b>Illness severity</b>                               |                                     |                                                      |                                      |                                            |          |
| Mean NEWS2<br>score (SD)                              | 3.7 (1.9)                           | 4.6 (2.5)                                            | 5.3 (2.6)                            | 5.7 (3.4)                                  | .001     |
| Mean FI-laboratory<br>score (SD)                      | .34 (.15)                           | .36 (.16)                                            | .37 (.14)                            | .41 (.15)                                  | .052     |

|                                                                  |         |         |         |         |       |
|------------------------------------------------------------------|---------|---------|---------|---------|-------|
| High clinical illness severity <sup>§</sup> , <i>N</i> (%)       | 5 (22)  | 38 (43) | 28 (64) | 24 (60) | .001  |
| High laboratory illness severity <sup>§§</sup> , <i>N</i> (%)    | 5 (22)  | 22 (25) | 12 (27) | 14 (35) | .20   |
| Both high clinical and laboratory illness severity, <i>N</i> (%) | 3 (13)  | 8 (9)   | 7 (16)  | 8 (20)  | .15   |
| <b>Discharge destination</b>                                     |         |         |         |         |       |
| Home without need for assistance, <i>N</i> (%)                   | 18 (78) | 17 (19) | 1 (2)   | 0 (0)   | <.001 |
| Home with assistance, <i>N</i> (%)                               | 2 (9)   | 46 (52) | 21 (48) | 7 (18)  | .32   |
| Short-term nursing home/rehabilitation, <i>N</i> (%)             | 0 (0)   | 17 (19) | 21 (48) | 25 (63) | <.001 |
| Long-term care facility, <i>N</i> (%)                            | 1 (4)   | 0 (0)   | 0 (0)   | 6 (15)  | .003  |

P-values for linear regressions of age, number of drugs at discharge, age-adjusted Charlson comorbidity index, length of stay, clinical and laboratory illness severity as dependent variables and CFS-category as independent variable. For hospital length of stay, the p-value results from a non-parametric Jonckheere-Terpstra test of trend. For binary dependent variables, p-values are from Chi square-tests of trend (linear-by-linear association). <sup>§</sup>High clinical illness severity = NEWS2-score  $\geq$  5. <sup>§§</sup>High laboratory illness severity = FI-value  $\geq$

.45. Abbreviations: *N* = Number of participants. IQR = Interquartile range, i.e., difference between 25th and 75th percentile, rounded to nearest integer). SD = Standard deviation. NEWS2 = New Early Warning Score 2, maximum value during hospital stay. CFS = Clinical Frailty Scale. CI = confidence interval. FI-Laboratory = Frailty index of 14 routine laboratory tests.

Supplementary material for «Association between clinical frailty, illness severity and post-discharge survival: A prospective cohort study of older medical inpatients in Norway», published in *European Geriatric Medicine*.  
Authors: Andreas Engvig, Torgeir Bruun Wyller, Eva Skovlund, Marc Vali Ahmed, Trygve Sundby Hall, Kenneth Rockwood, Anne Mette Njaastad, and Bjørn Erik Neerland.  
Corresponding Author: Andreas Engvig, M.D., Ph.D., [andreas.engvig@gmail.com](mailto:andreas.engvig@gmail.com)
