# Supplementary material
Source: PubMed Central journal article supplement (PMC9018659)
Supplement: 41999_2021_555_MOESM4_ESM.pdf [file 41999_2021_555_MOESM4_ESM.pdf]

Online Resource 4: The figure shows Kaplan-Meier survival curves for CFS categories 1 to 8

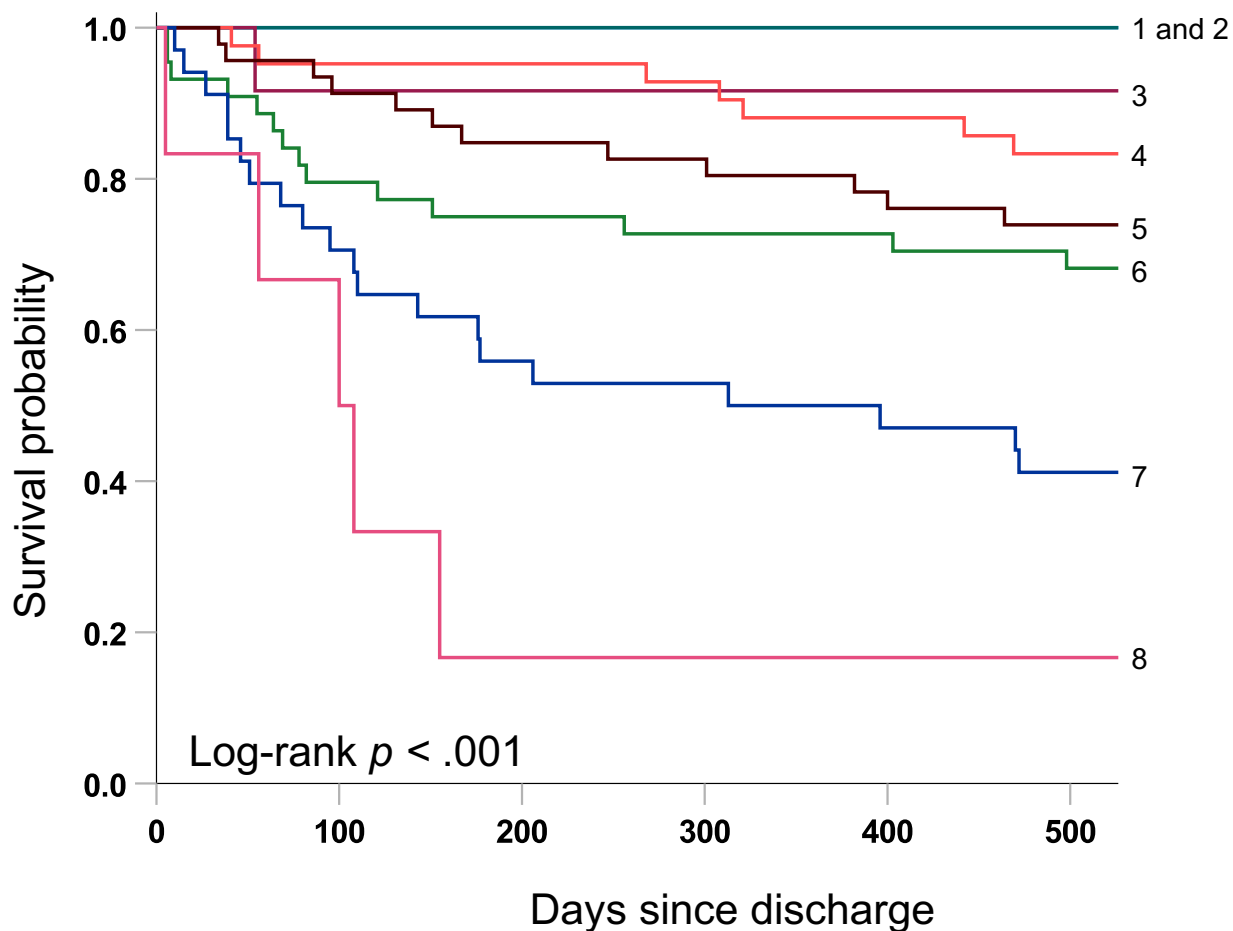

Supplementary material for «Association between clinical frailty, illness severity and post-discharge survival: A prospective cohort study of older medical inpatients in Norway», published in European Geriatric Medicine. Authors: Andreas Engvig, Torgeir Bruun Wyller, Eva Skovlund, Marc Vali Ahmed, Trygve Sundby Hall, Kenneth Rockwood, Anne Mette Njaastad, and Bjørn Erik Neerland.

Corresponding Author: Andreas Engvig, M.D., Ph.D., [andreas.engvig@gmail.com](mailto:andreas.engvig@gmail.com)
